# Supplementary material for: Synthesis and biological activity study of the retro-isomer of RhTx against TRPV1
Source: Royal Society of Chemistry journal article supplement (doi:10.1039/c9ra08829f), 2020-01-01
Supplement: c9ra08829f1.pdf [file c9ra08829f1.pdf]

# Synthesis and Biological Activity Study of the Retro- isomer of RhTx against TRPV1

Rilei Yu<sup>1,3†</sup>, Huijie Liu<sup>2†</sup>, Baishi Wang<sup>1,3†</sup>, Peta J Harvey<sup>4</sup>, Ningning Wei<sup>2\*</sup> and Yanyan Chu<sup>1,3\*</sup>

<sup>1</sup> Key Laboratory of Marine Drugs, Chinese Ministry of Education, School of Medicine and Pharmacy, Ocean University of China, Qingdao 266003, China

<sup>2</sup> Department of Pharmacology, Qingdao University School of Pharmacy, Qingdao 266021, China

<sup>3</sup> Laboratory for Marine Drugs and Bioproducts of Qingdao National Laboratory for Marine Science and Technology, Qingdao 266003, China

<sup>4</sup> Institute for Molecular Bioscience, The University of Queensland, Brisbane, QLD, 4072 Australia

RP-HPLC chromatography and High resolution mass spectrometry of RL-RhTx and RhTx

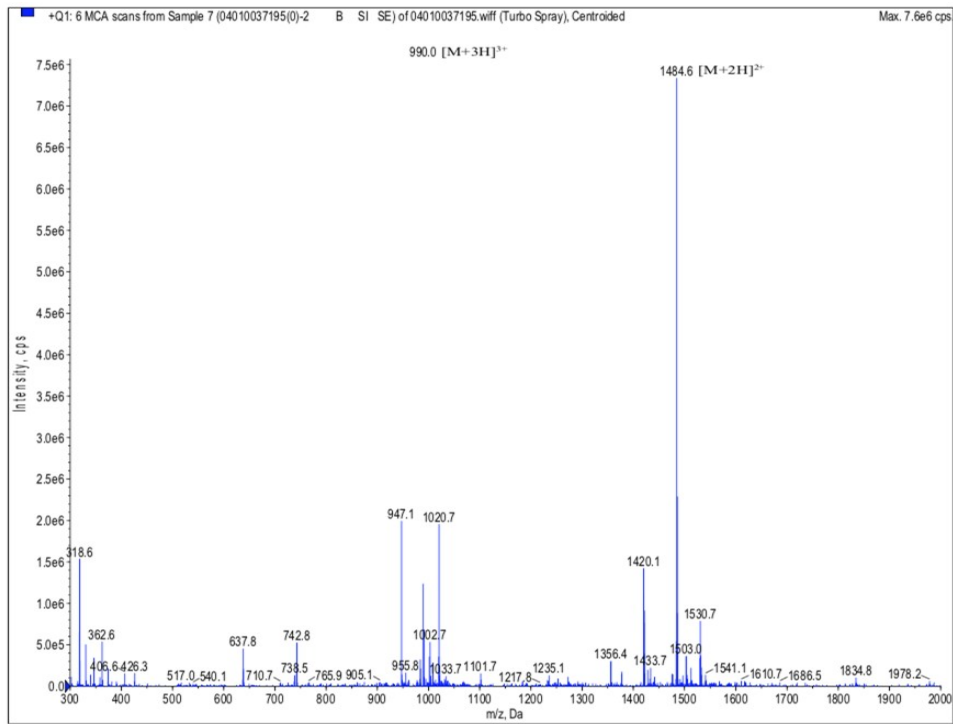

Figure S1 High resolution mass spectrometry of RL-RhTx

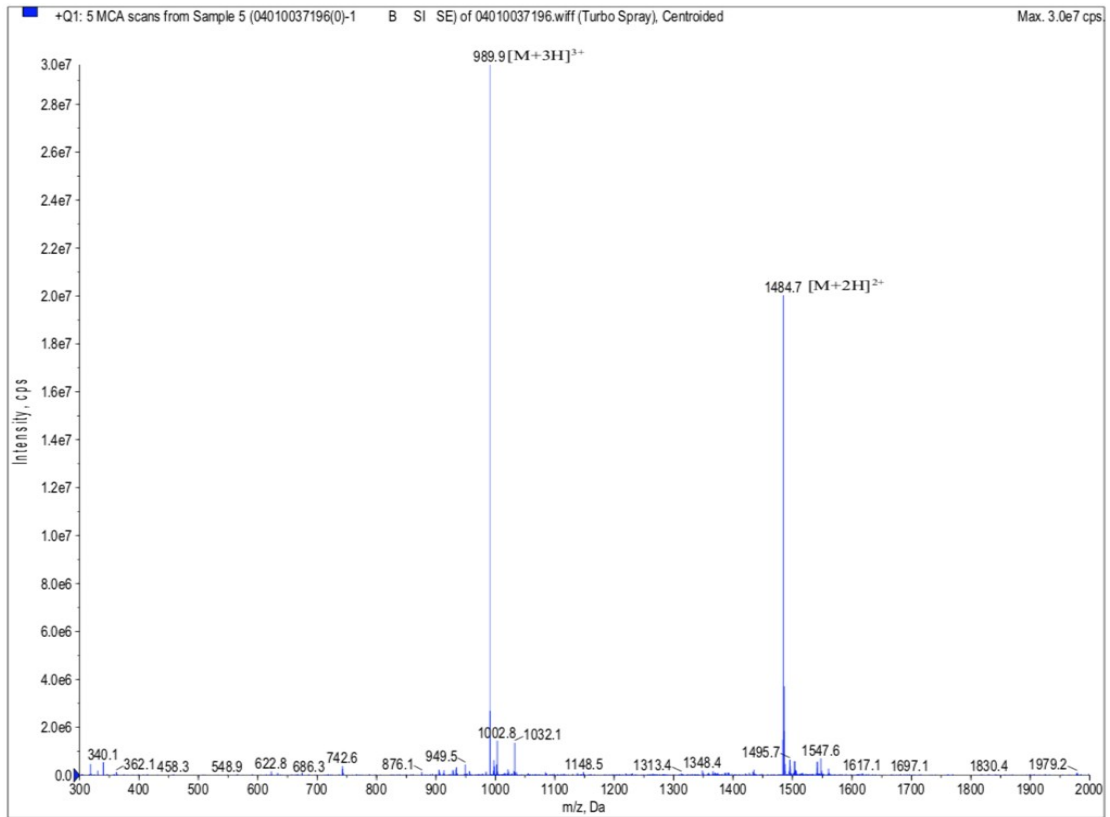

Figure S2 High resolution mass spectrometry of RhTx

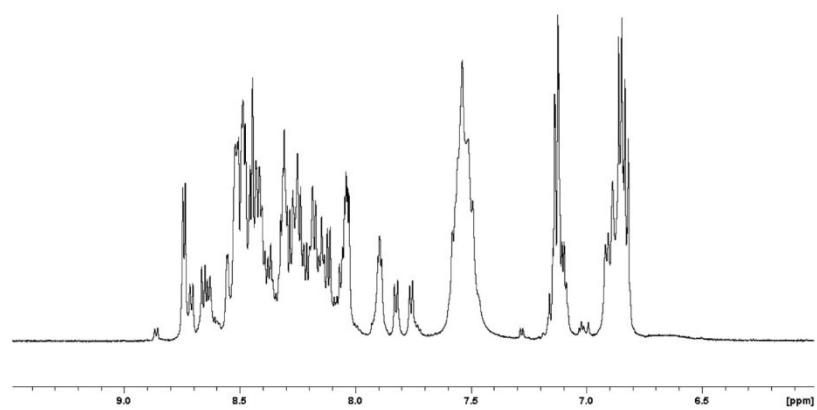

Figure S3 <sup>1</sup>H NMR spectrum of RL-RhTx, 600 MHz, detail of amide region
